# Supplementary material
Source: publisher figshare collection journal article supplement (https://acs.figshare.com/ndownloader/files/22652006)
Supplement: Supplementary file 1 [file 22652006]

## **Supplementary Information**

**LncRNA GAS5 and miR-137 polymorphisms and expression are associated with multiple sclerosis risk: mechanistic insights and potential clinical impact**

**Mahmoud A. Senousy<sup>1</sup>, Olfat G. Shaker<sup>2</sup>, Noha H. Sayed<sup>1</sup>, Nevine Fathy<sup>1</sup>, Mona A. Kortam<sup>1\*</sup>**

**<sup>1</sup>Biochemistry Department, Faculty of Pharmacy, Cairo University, Cairo, Egypt.**

**<sup>2</sup>Medical Biochemistry and Molecular Biology Department, Faculty of Medicine, Cairo University, Cairo, Egypt.**

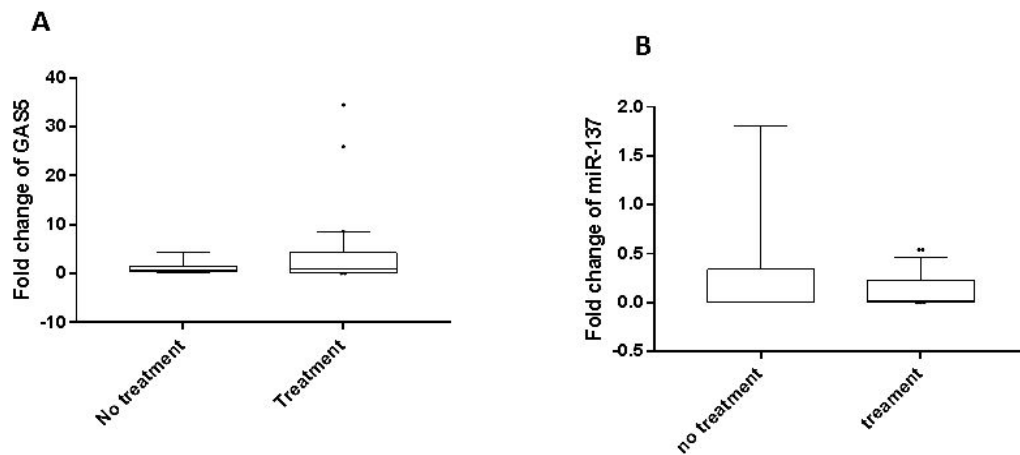

**Figure S1. Effect of treatment on serum GAS5 and miR-137 expression levels in MS patients.** The box represents the 25%-75% percentiles; the line inside the box represents the median and the upper and lower lines representing the 10%-90% percentiles of the fold change of serum GAS5 (A) and miR-137 (B) in patients receiving no treatment (n=15) or different treatment regimens at the time of blood collection (n=93). For GAS5, panel A  $P=0.86$ . For miR-137, panel B  $P=0.55$ . Data were compared by Mann Whitney U test.

**Table S1 Hardy-Weinberg equilibrium**

| rs2067079 |    |    |    |     |     |         |       |
|-----------|----|----|----|-----|-----|---------|-------|
|           | CC | CT | TT | C   | T   | P value |       |
| Control   | 46 | 53 | 5  | 145 | 63  | 0.061   |       |
| MS        |    | 52 | 40 | 16  | 144 | 72      | 0.086 |
| rs1625579 |    |    |    |     |     |         |       |
|           | TT | GT | GG | T   | G   | P value |       |
| Control   | 43 | 49 | 12 | 135 | 73  | 0.83    |       |
| MS        |    | 62 | 39 | 7   | 163 | 53      | 0.8   |

Data are presented with numbers.

**Table S2 Association of rs2067079 with MS type and EDSS score in MS patients**

| rs2067079 association with MS type |           |              |              |                  |                       | rs2067079 association with EDSS score |           |                  |                  |                  |                       |
|------------------------------------|-----------|--------------|--------------|------------------|-----------------------|---------------------------------------|-----------|------------------|------------------|------------------|-----------------------|
| Model                              | Geno-type | RRMS<br>n=82 | SPMS<br>n=26 | OR (95% CI)      | <i>P</i> <sup>a</sup> | Model                                 | Geno-type | EDSS<3.5<br>n=51 | EDSS≥3.5<br>n=57 | OR (95% CI)      | <i>P</i> <sup>a</sup> |
| Codominant                         | C/C       | 36 (43.9%)   | 16 (61.5%)   | 1.00             | 0.3                   | Codominant                            | C/C       | 21 (41.2%)       | 31 (54.4%)       | 1.00             | 0.39                  |
|                                    | C/T       | 33 (40.2%)   | 7 (26.9%)    | 0.48 (0.18-1.33) |                       |                                       | C/T       | 21 (41.2%)       | 19 (33.3%)       | 0.63 (0.26-1.49) |                       |
|                                    | T/T       | 13 (15.8%)   | 3 (11.5%)    | 0.51 (0.13-2.05) |                       |                                       | T/T       | 9 (17.6%)        | 7 (12.3%)        | 0.50 (0.16-1.61) |                       |
| Dominant                           | C/C       | 36 (43.9%)   | 16 (61.5%)   | 1.00             | 0.12                  | Dominant                              | C/C       | 21 (41.2%)       | 31 (54.4%)       | 1.00             | 0.19                  |
|                                    | C/T-T/T   | 46 (56.1%)   | 10 (38.5%)   | 0.49 (0.20-1.22) |                       |                                       | C/T-T/T   | 30 (58.8%)       | 26 (45.6%)       | 0.59 (0.27-1.30) |                       |
| Recessive                          | C/C-C/T   | 69 (84.2%)   | 23 (88.5%)   | 1.00             | 0.55                  | Recessive                             | C/C-C/T   | 42 (82.3%)       | 50 (87.7%)       | 1.00             | 0.38                  |
|                                    | T/T       | 13 (15.8%)   | 3 (11.5%)    | 0.67 (0.17-2.60) |                       |                                       | T/T       | 9 (17.6%)        | 7 (12.3%)        | 0.61 (0.20-1.85) |                       |
| Overdominant                       | C/C-T/T   | 49 (59.8%)   | 19 (73.1%)   | 1.00             | 0.23                  | Overdominant                          | C/C-T/T   | 30 (58.8%)       | 38 (66.7%)       | 1.00             | 0.47                  |
|                                    | C/T       | 33 (40.2%)   | 7 (26.9%)    | 0.56 (0.21-1.48) |                       |                                       | C/T       | 21 (41.2%)       | 19 (33.3%)       | 0.74 (0.33-1.67) |                       |
| Log-additive                       | ---       | ---          | ---          | 0.63 (0.33-1.23) | 0.17                  | Log-additive                          | ---       | ---              | ---              | 0.69 (0.40-1.19) | 0.18                  |
| Alleles                            | C         | 105 (0.64)   | 39 (0.75)    | 0.59 (0.3-1.2)   | 0.17 <sup>b</sup>     | Alleles                               | C         | 63 (0.62)        | 81 (0.71)        | 0.66 (0.38-1.18) | 0.15 <sup>b</sup>     |
|                                    | T         | 59 (0.36)    | 13 (0.25)    |                  |                       |                                       |           |                  |                  |                  |                       |

Values are expressed as number (percentage). EDSS, expanded disability status scale score; RRMS, relapsing remitting MS; SPMS, slowly progressive MS. *P*<0.05 is significantly different.

<sup>a</sup>adjusted with age and sex in logistig regression model

<sup>b</sup>crude value

**Table S3 Association of rs1625579 with MS type and EDSS score in MS patients**

| rs1625579 association with MS type |           |              |              |             |                       | rs1625579 association with EDSS score |           |                  |                  |             |                       |
|------------------------------------|-----------|--------------|--------------|-------------|-----------------------|---------------------------------------|-----------|------------------|------------------|-------------|-----------------------|
| Model                              | Geno-type | RRMS<br>n=82 | SPMS<br>n=26 | OR (95% CI) | <i>P</i> <sup>a</sup> | Model                                 | Geno-type | EDSS<3.5<br>n=51 | EDSS≥3.5<br>n=57 | OR (95% CI) | <i>P</i> <sup>a</sup> |

|              |         |            |            |                   |                   |              |         |            |            |                   |                   |
|--------------|---------|------------|------------|-------------------|-------------------|--------------|---------|------------|------------|-------------------|-------------------|
| Codominant   | T/T     | 46 (56.1%) | 16 (61.5%) | 1.00              | 0.36              | Codominant   | T/T     | 28 (54.9%) | 34 (59.6%) | 1.00              | 0.32              |
|              | G/T     | 32 (39%)   | 7 (26.9%)  | 0.61 (0.22-1.66)  |                   |              | G/T     | 21 (41.2%) | 18 (31.6%) | 0.57 (0.24-1.34)  |                   |
|              | G/G     | 4 (4.9%)   | 3 (11.5%)  | 1.94 (0.37-10.02) |                   |              | G/G     | 2 (3.9%)   | 5 (8.8%)   | 1.60 (0.26-9.75)  |                   |
| Dominant     | T/T     | 46 (56.1%) | 16 (61.5%) | 1.00              | 0.54              | Dominant     | T/T     | 28 (54.9%) | 34 (59.6%) | 1.00              | 0.31              |
|              | G/T-G/G | 36 (43.9%) | 10 (38.5%) | 0.75 (0.30-1.89)  |                   |              | G/T-G/G | 23 (45.1%) | 23 (40.4%) | 0.66 (0.29-1.49)  |                   |
| Recessive    | T/T-G/T | 78 (95.1%) | 23 (88.5%) | 1.00              | 0.31              | Recessive    | T/T-G/T | 49 (96.1%) | 52 (91.2%) | 1.00              | 0.43              |
|              | G/G     | 4 (4.9%)   | 3 (11.5%)  | 2.35 (0.47-11.66) |                   |              | G/G     | 2 (3.9%)   | 5 (8.8%)   | 2.01 (0.34-11.72) |                   |
| Overdominant | T/T-G/G | 50 (61%)   | 19 (73.1%) | 1.00              | 0.23              | Overdominant | T/T-G/G | 30 (58.8%) | 39 (68.4%) | 1.00              | 0.15              |
|              | G/T     | 32 (39%)   | 7 (26.9%)  | 0.56 (0.21-1.49)  |                   |              | G/T     | 21 (41.2%) | 18 (31.6%) | 0.55 (0.24-1.26)  |                   |
| Log-additive | ---     | ---        | ---        | 0.98 (0.47-2.04)  | 0.96              | Log-additive | ---     | ---        | ---        | 0.84 (0.44-1.63)  | 0.61              |
| Alleles      | T       | 124 (0.76) | 39 (0.75)  | 1.033 (0.52-2.06) | 0.99 <sup>b</sup> | Alleles      | T       | 77 (0.75)  | 86 (0.75)  | 1.003 (0.55-1.86) | 0.99 <sup>b</sup> |
|              | G       | 40 (0.24)  | 13 (0.25)  |                   |                   |              | G       | 25 (0.25)  | 28 (0.25)  |                   |                   |

Values are expressed as number (percentage). EDSS, expanded disability status scale score; RRMS, relapsing remitting MS; SPMS, slowly progressive MS.  $P < 0.05$  is significantly different.

<sup>a</sup>adjusted with age and sex in logistic regression model

<sup>b</sup>crude value

**Table S4 Correlation of serum GAS5 and miR-137 with MS type and severity in MS patients**

| Parameter | Serum GAS5 |      | Serum miR-137 |      |
|-----------|------------|------|---------------|------|
|           | r          | p    | r             | p    |
| MS type   | 0.135      | 0.25 | 0.105         | 0.41 |
| EDSS      | 0.112      | 0.5  | 0.007         | 0.95 |

Correlation was conducted by Spearman correlation.  $P < 0.05$  is significantly different.
